# Supplementary material for: Mild cognitive impairment in type 2 diabetes is associated with fibrinogen-to-albumin ratios
Source: PeerJ. 2023 Aug 7;11:e15826. doi: 10.7717/peerj.15826 (PMC10414025; doi:10.7717/peerj.15826)
Supplement: Supplemental Information 1 — Demographics, drinking and smoking habits, duration of diabetes, educational level, blood pressure (SBP and DBP), BMI (weight (kg)/height (m2)), Alanine aminotransferase (ALT), aspartate transaminase (AST), γ-glutamyl transpeptidase (GGT), urea nitrogen (BUN), creatinine (Cr), estimated glomerular filtration rate (eGFR), uric acid (UA), albumin (ALB), fibrinogen (FIB), glycosylated haemoglobin A1c (HbA1c), glucose (GLU), total cholesterol (TC), triglyceride (TG), high-density lipoprotein cholesterol (HDL-C), and low-density lipoprotein cholesterol (LDL-C) and MoCA score. [file peerj-11-15826-s001.xlsx]

## Sheet: Sheet1
Serial Number	Sex （1 male, 2 female ）	Age（years）	Age-group（1 ≥60, 0 ＜60岁）	Years of edacation（years）	Smoking （1 Yes，0 No）	Drinking（1 Yes，0 No）	Diabetic duration（years）	SBP(mmHg)	DBP(mmHg)	BMI kg/m2	ALT (U/L)	AST (U/L)	GGT (U/L)	BUN (mmol/L)	Cr (μmol/L)	eGFR (ml/min/1.73m2)	UA (mmol/L)	PALB (mg/L)	ALB (g/L)	FIB (g/L)	HbA1c (%)	Glucose (mmol/L)	TC (mmol/L)	TG (mmol/L)	HDL-C (mmol/L)	LDL-C (mmol/L)	MoCA scores-（0-30）(normal is ≥26, MCI is <26)	MCI （1 Yes，0 No）	FIB/ALB	Q1-Q4
1	1	53	0	12	1	1	8	140	80	30.1	17	15.5	33.3	8.21	69.4	102.78	357.3	301.91	51.74	2.82	6	7.08	4.22	2.02	0.88	2.78	26	0	0.0545033	1
2	1	37	0	18	1	1	0.005	130	80	21.5	9.9	12.5	26	4.26	66.9	116.76	371.3	235.07	49.49	3.54	11.7	10.49	5.51	1.91	1.01	4	26	0	0.0715296	2
3	2	68	1	9	0	0	1	160	77	29.4	23.2	21.1	18.2	5.44	46.4	97.87	344.4	179.66	39.7	2.74	6.3	6.26	4.24	2.11	1.12	2.4	26	0	0.0690176	2
4	1	70	1	9	0	1	11	115	71	23.7	14.1	14.6	21.3	10.6	70.2	90.78	188.2	207.86	34.08	4.7	10.3	11.77	4.94	0.81	1.36	2.77	26	0	0.137911	4
5	1	65	1	9	0	1	18	150	80	27	18	17	33	6.1	89.5	77.47	381.3	282.81	40.36	4.8	8.7	6.52	4.98	1.8	1.14	3.3	26	0	0.11893	4
6	1	42	0	16	0	1	0.5	148	111	27.3	22.1	18.2	31.3	5.72	65	114.07	381.6	287	44.14	4.56	11.8	7.31	6.52	1.5	1.13	3.96	26	0	0.103308	3
7	2	37	0	16	0	0	0.003	136	95	26.8	22.6	19.6	18.8	5.14	37.6	130.4	419.1	290	45.43	3	7	6.2	4.07	2.64	0.85	2.64	26	0	0.0660357	2
8	2	65	1	10	0	0	10	129	77	21.6	23.4	24.4	19.7	5.2	57.9	92.93	214	226.74	45.7	3.26	7.2	6.77	6.27	0.71	1.77	4.41	26	0	0.0713348	2
9	2	72	1	9	0	0	24	135	72	21.1	17.2	14.4	12.7	6.02	52.7	91.26	320.9	261.04	50.74	2.66	8.9	8.44	3.92	2.25	0.93	2.24	26	0	0.0524241	1
10	2	52	0	12	0	0	8	152	88	30.9	12.8	14	13.5	7.15	59.3	101.2	280.5	200.89	45.09	3.7	8.6	4.56	4.15	1.37	0.85	2.83	26	0	0.0820581	2
11	1	55	0	14	0	1	12	139	79	27.4	21.3	14.2	22.6	4.93	61.4	106.58	381	299.15	49.07	2.9	8.5	8.77	4.68	1.07	1.13	2.99	26	0	0.0590992	1
12	2	45	0	16	0	0	4	126	81	25.7	31.2	22	27	5.83	50.3	112.02	281.8	242.85	42.22	2.99	7.7	9.08	3.21	1.84	0.82	1.74	26	0	0.0708195	2
13	2	56	0	10	1	0	20	153	76	32.5	63	34.2	34.9	4.62	35.3	116.5	391.9	283.2	46.23	4.34	7.9	7.14	5.01	2.57	1.21	2.83	26	0	0.0938784	3
14	1	64	1	9	1	0	0.016	175	96	26.4	5.5	9.8	68.8	8.12	86.5	81.29	512.4	150.54	30.75	5.96	8.3	5.7	3.06	1.92	0.49	1.58	26	0	0.193821	4
15	2	64	1	9	0	0	1	120	64	19.3	10.5	11.9	12.8	7.26	49.9	98.28	233.5	195.58	43.45	3.25	6.1	4.71	5.2	0.55	1.48	3.36	26	0	0.0747986	2
16	1	47	0	16	1	1	4	127	92	23.9	24	20.1	58.5	5.68	53.5	119.31	331.2	316.48	47.05	3.06	8.7	12.18	4.99	6.47	0.9	2.78	26	0	0.0650372	2
17	1	60	1	12	1	1	1	146	92	25.4	33.1	23	26.8	5.7	54.3	108.23	220.8	225.72	51.41	2.79	8.8	6.75	3.87	0.68	1.21	2.14	26	0	0.0542696	1
18	2	58	0	12	0	0	6	96	64	25.7	13.9	14.2	9	5.66	51.2	101.65	221.6	196.97	41.39	2.59	7.4	6.98	4.49	0.84	1.13	3.11	26	0	0.0625755	1
19	2	59	0	9	0	0	20	130	70	28	31.8	27	17.7	5.16	45.7	105.52	280	214.54	44.9	2.9	7	5.58	4.73	1.81	1.11	3.05	26	0	0.064588	1
20	1	34	0	16	0	0	0.003	130	75	22.9	33.9	31.9	61.5	4.55	66.8	119.32	455.8	336.26	53.1	3.39	8.1	8.1	5.13	8.68	0.85	1.62	26	0	0.0638418	1
21	1	53	0	12	1	1	12	118	76	28.4	39.8	22.9	35.4	5.2	64.7	105.79	313.2	277.14	48.97	2.74	9.7	8.35	3.89	1.99	1	2.15	26	0	0.0559526	1
22	2	58	0	9	0	0	4	119	84	23.4	23.9	21.2	23.2	5.77	54.8	99.4	200.4	266.96	46.57	3.23	8.2	7.09	5.2	2.11	1.19	2.96	26	0	0.069358	2
23	1	65	1	9	0	0	7	181	80	25.7	45.8	23.9	42.5	5.37	65	97.05	510	251.14	44.56	3	7.4	7.16	4.33	4.84	0.76	2.04	26	0	0.067325	2
24	1	50	0	13	1	1	8	152	92	24.7	11.5	14.9	23	4.08	77.5	100.31	303.2	304.13	53.03	2.35	6.2	6.82	4.42	1.71	1.2	2.78	26	0	0.0443145	1
25	2	50	0	15	0	0	0.003	141	73	19.5	9.1	9.9	11.6	4.72	28.6	130.23	220.1	211.79	37.61	3.4	10.9	15.43	4.99	1.2	1.43	2.95	26	0	0.0904015	3
26	1	58	0	9	0	1	10	147	82	24.7	11.1	15.4	26.2	4.43	57.4	107.29	321.4	197.27	44.06	2.86	8.1	8.02	2.95	0.97	0.94	1.6	26	0	0.0649115	1
27	2	52	0	12	0	0	27	162	93	23.6	19.3	22.8	15.8	6.67	50.1	106.78	219.3	249	45.57	4.06	8.3	17.52	5.97	0.71	1.74	3.4	26	0	0.0890937	3
28	2	49	0	16	0	0	10	124	87	22.9	28	19.2	32.2	8.18	42.5	115.12	304.9	269.96	50.29	3.76	11.4	11.78	5.14	2.29	1.18	3.06	26	0	0.0747664	2
29	1	62	1	9	1	1	0.016	117	65	21.9	23.5	18.3	42.2	5.17	60.2	102.29	339.2	288.98	42.69	2.95	7	5.6	3.27	2.2	0.78	1.78	26	0	0.0691028	2
30	1	50	0	16	1	1	10	139	96	29.8	22.8	15.9	49.7	7.73	85.1	91.48	553.1	258.43	43.4	3.72	9.7	15.08	4.48	3.07	0.95	2.4	26	0	0.0857143	3
31	1	48	0	16	0	0	10	111	79	26	33.6	16.2	34.8	10.05	57.7	114.85	297.6	348.03	43.5	2.85	7.2	6.42	3.85	2.89	0.74	2.4	26	0	0.0655172	2
32	2	57	0	12	0	0	5	84	69	22.5	12.2	14.4	9.1	4.43	43.7	107.84	263.1	245.71	38.4	2.17	7.3	5.93	4.55	1.41	0.93	3	26	0	0.0565104	1
33	2	71	1	9	0	0	4	138	84	24.8	12.5	12.7	26.3	7.97	59	88.55	205.6	314.01	43	3.02	7.7	7.61	4.73	1.66	1.18	3.01	26	0	0.0702326	2
34	1	36	0	16	1	0	2	110	75	21.5	12.6	12.9	24.9	4.3	60	122.96	277.4	301.04	44.1	3.27	11.5	7.64	5.76	1.34	1.09	4.2	26	0	0.0741497	2
35	1	59	0	9	1	1	0.5	139	77	25.5	36.4	22.8	41.3	7.53	88	82.47	408.1	305.59	44.7	2.77	6.6	5.79	3.27	1.65	0.79	1.83	26	0	0.0619687	1
36	1	42	0	12	0	0	0.055	126	73	25.8	29.9	17.8	19.3	4.92	39.6	139.84	285.6	221.42	44.2	3.73	12.4	12.85	4.18	1.31	1.04	2.76	26	0	0.0843891	3
37	1	56	0	9	1	1	10	124	70	23.5	18.8	21.4	29.5	5.88	79.6	95.09	482.4	256.34	46.9	3.02	7	6.66	4.97	1.33	1.01	3.65	26	0	0.0643923	1
38	2	28	0	12	0	0	0.027	131	85	19.1	13.1	12.7	16.7	3.82	50.1	126.39	303.2	167.83	41	3.08	7.1	6.4	3.24	1.16	0.56	2.28	26	0	0.075122	2
39	1	60	1	9	1	1	8	127	72	25.1	18.3	17.2	53.2	5.23	50.8	111.24	288.9	238.05	40.4	2.85	10.1	11.71	6.26	6.99	0.85	3.15	26	0	0.0705446	2
40	2	59	0	12	0	0	9	120	65	25	18.9	17.6	23.9	7.07	47.8	103.24	275.1	222.31	37.6	2.01	8.9	7.68	5.02	2.94	0.86	3.37	26	0	0.0534574	1
41	1	19	0	12	0	0	0.038	148	91	29.9	55.5	27	43.3	5.16	58.8	139.71	490.9	247.32	43.2	2.79	10.2	7.08	5.29	1.51	1.3	3.41	26	0	0.0645833	1
42	1	49	0	12	0	0	17	115	76	26.1	24.6	18.1	29.5	5.65	61.2	111.32	422.4	283.1	43.2	2.42	8.8	6.7	3.36	2	0.99	1.67	26	0	0.0560185	1
43	1	49	0	12	1	1	0.008	132	91	26.7	26.2	17.3	67.1	6.18	55.9	115.54	406	262.89	42.2	2.45	6.5	5.42	5.57	1.71	0.99	4.03	26	0	0.0580569	1
44	2	41	0	16	0	0	2	153	95	33.1	38.4	31.4	21.1	5	40.4	123.82	280.6	174.36	37.9	2.85	9.9	9.92	3.9	2.18	0.75	2.4	26	0	0.0751979	2
45	2	35	0	16	0	0	2	95	68	22.7	9.3	11.5	7.3	6	34.4	136.17	226.5	180.47	36.2	2.7	12.6	11.29	3.86	0.36	1.16	2.57	26	0	0.0745856	2
46	1	50	0	12	0	0	11	130	70	23.3	19.9	13.7	17.1	6.41	51.3	118.85	256.6	216.66	37.5	1.99	12.7	14.35	5.07	1.34	1.47	3.02	26	0	0.0530667	1
47	1	49	0	12	1	1	9	152	104	30.9	55.2	37.3	32	3.86	62.5	110.36	583.1	292.17	43.4	2.61	6.8	5.65	4.27	3.42	0.92	2.4	26	0	0.0601382	1
48	2	41	0	16	1	0	8	149	93	24.5	25.1	19.8	15.5	4.47	50.9	114.76	263	196.62	42.4	2.48	8.6	9.16	5.04	2.8	0.84	3.2	26	0	0.0584906	1
49	2	67	1	9	0	0	6	142	65	24.5	14.6	15.3	30	6.85	61.2	89.98	238.6	234.89	39.3	2.57	7.2	7.42	5.52	4.43	0.92	3.41	26	0	0.0653944	2
50	1	39	0	12	1	0	10	156	90	29.6	53	27.2	56	5.03	81.2	104.6	392.7	300.53	43.5	3.27	9.6	11.15	5.69	2.95	0.96	3.94	26	0	0.0751724	2
51	2	57	0	9	0	0	12	128	89	22.6	16.6	12.6	15.3	7.71	37	113.91	156.9	202.05	39.1	2.21	10.9	11.69	5.73	1.61	1.27	3.95	26	0	0.0565217	1
52	1	59	0	9	0	0	3	128	77	24.5	27.4	19.5	26.3	5.48	48.3	114.37	268.1	225.89	44	2.57	8.6	8.4	6.25	1.83	1.39	4.33	26	0	0.0584091	1
53	1	37	0	16	1	1	0.005	137	74	29.4	28	22.5	61.5	3.76	39.7	144.69	430.5	103.6	42.7	7.44	12.1	16.58	7.22	4.49	1.15	4.2	26	0	0.174239	4
54	1	55	0	9	0	1	10	135	80	23.6	24.7	24.2	58.5	5.93	63.6	105.05	325	362.17	44.1	2.04	7.2	6.95	6.67	3.32	1.21	4.7	26	0	0.0462585	1
55	1	67	1	9	1	1	17	122	73	26.6	16.8	17.2	20.3	8.54	62.5	97.25	390.7	324.99	42	2.85	8.2	5.92	5.87	1.13	0.92	4.16	26	0	0.0678571	2
56	2	32	0	16	0	0	5	125	83	26.3	12.9	12.8	16.3	3.71	44.4	127.87	286	177.56	37	2.66	10.9	15.45	5.42	1.45	1.05	3.86	26	0	0.0718919	2
57	2	32	0	9	0	0	13	112	61	19.6	23.1	15.7	15.6	9.63	58.8	116.58	387.8	224.85	41.2	3.56	8.1	6.41	3.74	1.3	0.9	2.5	26	0	0.0864078	3
58	2	52	0	12	0	0	0.038	149	94	27.5	68	41.9	42.8	3.89	31.7	124.14	338.6	240.63	42	3.16	8	6.67	4.66	2.08	1.01	2.95	26	0	0.0752381	2
59	2	50	0	12	0	0	0.027	138	71	27.7	48.1	19.4	23.8	4.09	54.3	105.46	290.3	224.45	41.8	2.91	7.7	6.68	4.25	1.69	0.98	2.36	26	0	0.0696172	2
60	1	59	0	9	1	1	3	131	78	28.7	16.5	14.6	27.6	5.27	52.7	110.34	323.1	315.13	45.6	2.32	10.6	7.86	5.25	2.45	1.16	3.09	26	0	0.0508772	1
61	1	40	0	9	0	0	8	112	76	24.4	36.3	24.1	31.4	6.55	73.2	110.17	310.6	241.55	41.8	2.46	9.1	7.2	3.58	1.35	0.68	2.18	26	0	0.0588517	1
62	2	42	0	12	0	0	0.003	122	83	21.9	37.5	24	50.4	5.54	37.5	126.01	314.3	243.04	44.6	4.35	7.2	7.77	5.84	1.51	1.25	3.78	26	0	0.0975336	3
63	1	56	0	12	0	1	4	130	80	20.4	8.3	15.3	29.1	6.94	84.6	88.33	231.6	360.7	44.3	3.41	6.1	5.95	3.86	1.47	1.61	1.94	26	0	0.0769752	2
64	2	74	1	6	0	0	11	146	68	20.6	25.8	17.6	16.3	8.25	50.5	91.25	255.3	198.89	38.6	2.66	8.4	5.85	3.95	1.35	1.13	2.22	26	0	0.0689119	2
65	2	20	0	12	0	0	0.019	123	75	30.7	55	36.8	26.6	3.01	45.9	137.61	334.9	195.54	40.8	2.49	8.7	7.63	3.69	1.26	0.6	2.31	26	0	0.0610294	1
66	1	53	0	9	1	1	6	128	78	22.8	22.2	13.9	37.9	5.06	50.6	117.03	332.2	276.13	42.5	2.15	7	5.97	3.17	1.05	0.85	1.73	26	0	0.0505882	1
67	2	51	0	9	0	0	0.016	125	81	29.4	13.3	12.9	12.9	4.42	48.7	108.54	230.6	209.32	42	2.53	6.8	6.49	3.12	1.5	0.58	1.77	26	0	0.0602381	1
68	1	48	0	9	0	1	1	152	93	24.2	67.3	34.4	183.9	5.48	71.9	104.92	381.4	263.49	46.3	2.42	8.8	9.94	6.01	1.56	1.15	4	26	0	0.0522678	1
69	1	44	0	12	0	0	1	138	86	28.5	52	27.9	143.5	6.01	68.5	110.08	502	322.64	44.5	2.57	8.4	7.93	5.53	5.25	0.89	2.86	26	0	0.0577528	1
70	1	58	0	9	1	1	11	134	86	24.8	43.3	30.2	126.3	7.34	80.7	92.22	285.5	316.7	38.8	2.48	7.5	6.3	6.12	2.81	1.1	3.97	26	0	0.0639175	1
71	1	32	0	16	1	1	2	145	92	26.9	9.1	9.9	17.6	4.95	57.2	128.97	335	218.03	40.7	2.61	11.8	11.4	5.73	1.42	0.93	4.06	27	0	0.0641278	1
72	1	34	0	12	0	0	3	166	114	22.7	90.8	39.2	117.5	4.55	71.5	116.03	384.8	267.76	45.7	2.48	8.5	8.13	5.59	1.54	1.2	3.76	27	0	0.054267	1
73	2	51	0	12	0	0	5	93	78	26.4	27.7	34.4	20.1	4.25	39.7	116.09	479.9	315.56	44.8	3.41	6.5	6.43	6.5	2.74	1.45	4.17	27	0	0.0761161	2
74	1	41	0	12	0	0	14	119	87	23.7	36	23.7	81.1	8.48	75.2	108.19	308.7	286.45	42.6	3.79	8.8	10.67	5.32	3.29	1.17	2.94	27	0	0.0889671	3
75	2	54	0	9	0	0	0.019	141	81	29.6	30.2	21.5	26.8	5.53	39.4	113.95	257.5	216.48	40.8	3.02	10.6	11.65	6.38	2.14	1.37	4.25	27	0	0.0740196	2
76	1	37	0	12	1	0	3	131	81	28	55.9	26.1	55	6.6	89.1	94.82	489.5	196.5	38.6	4.42	6.6	6.79	4.59	1.49	1.14	2.83	27	0	0.114508	4
77	2	55	0	9	0	0	6	122	65	25.8	16.9	14.7	20.4	5.67	54.2	101.88	279.4	221.07	38.7	3.14	9.4	11.59	4.92	2.75	0.92	2.91	27	0	0.081137	2
78	2	52	0	9	0	0	6	110	78	25.2	15.7	15.4	31.1	5.6	45.2	110.46	196.2	197.35	39.2	2.4	11	7.47	3.98	1.3	1.22	2.28	27	0	0.0612245	1
79	1	60	1	9	1	1	13	165	102	22.6	27	20.8	22.5	5.04	61.1	103.11	290	279.83	44.7	2.33	8.2	8.61	4.2	0.96	1.22	2.61	27	0	0.0521253	1
80	1	64	1	9	1	1	8	108	71	26	12.3	10.2	10.1	10.16	63.4	98.74	229.9	181.14	41.1	3.16	8.3	6.79	3.37	0.98	1.04	1.79	27	0	0.0768856	2
81	1	46	0	12	0	0	1	136	93	20.3	17.5	12.6	37.9	6.09	56.8	117.23	238.2	323.9	45.9	2.57	11.4	12.49	4.55	2.21	1.04	2.8	27	0	0.0559913	1
82	1	45	0	12	1	0	6	135	88	18.1	23.7	19.6	37	6.72	58.4	116.71	327.8	350.17	44.2	2.46	9.4	11.25	4.33	3.58	0.95	1.96	27	0	0.0556561	1
83	2	66	1	12	0	0	11	149	75	22.2	16.7	20.4	17.4	4.1	59.8	91.31	307.6	195.25	41	2.54	6.5	5.72	6.15	2.31	0.93	4.37	27	0	0.0619512	1
84	2	21	0	9	0	0	0.016	125	86	24.7	32.1	25.6	38.4	5.59	33.9	150.97	247.5	222.85	46.2	2.46	11.4	7.46	5.39	1.78	1.2	3.62	27	0	0.0532468	1
85	2	52	0	9	0	0	15	127	72	26.4	22.6	17.1	17.1	5.89	49.9	106.92	285.5	242.61	40.8	2.35	8.1	7.89	4.17	2.72	1.02	2.26	27	0	0.057598	1
86	1	57	0	9	1	1	1	145	84	27.3	37.5	15.7	39.4	5.81	61	105.38	284.9	300.12	43	2.62	8.2	8.95	4.01	3.54	0.81	2.24	27	0	0.0609302	1
87	1	57	0	12	0	1	5	155	107	24.5	81.7	58.4	100.1	4.23	61.3	105.16	282.9	368.85	44.4	2.85	7	9.5	5.44	3.49	1.05	3.39	27	0	0.0641892	1
88	1	49	0	12	1	1	0.022	141	96	30.8	17.2	15	41.7	6.88	68.7	106.15	311.1	269.62	44.6	3.3	10	7.97	5.94	1.74	0.96	4.03	27	0	0.073991	2
89	2	24	0	12	0	0	0.044	105	60	26.2	54.6	22.8	36.2	2.25	42.1	137.56	323	151.51	36.8	3.17	12.6	6.4	2.9	1.76	0.41	1.87	27	0	0.0861413	3
90	1	24	0	12	1	1	3	137	86	26.9	59.8	23.7	39	3.87	59.8	133.96	388.1	293.17	41.3	3.23	9.7	6.81	3.79	1.61	0.74	2.3	27	0	0.0782082	2
91	1	34	0	16	0	0	3	166	114	28	90.8	39.2	117.5	4.55	71.5	116.03	384.8	267.76	45.7	2.48	8.5	8.13	5.59	1.54	1.2	3.76	27	0	0.054267	1
92	2	55	0	12	0	0	6	122	65	25.8	16.9	14.7	20.4	5.67	54.2	101.88	279.4	221.07	38.7	3.14	9.4	11.59	4.92	2.75	0.92	2.91	27	0	0.081137	2
93	2	52	0	9	0	0	6	110	78	23.3	15.7	15.4	31.1	5.6	45.2	110.46	196.2	197.35	39.2	2.4	11	7.47	3.98	1.3	1.22	1.87	27	0	0.0612245	1
94	1	46	0	12	1	1	15	127	83	26.8	23.2	19.4	12.1	6	43.2	131.19	354.3	405.53	40	1.99	8.4	10.12	5.11	5.04	1.08	1.78	27	0	0.04975	1
95	1	39	0	16	1	1	9	127	83	24.8	20.3	13.4	30.8	5.75	53.3	126.4	397.9	287.17	44.4	4.19	6.8	6.92	4.46	1.16	0.81	3.18	27	0	0.0943694	3
96	1	59	0	12	1	0	5	172	94	19.9	22.2	20.9	17.7	5.08	71.6	97.28	329.1	214.77	43.4	2.9	5.9	4.36	4.8	1.33	91	3.36	27	0	0.0668203	2
97	1	36	0	16	1	1	0.027	125	62	20.8	20.2	17	14.8	6.49	68.3	116.58	417.7	242.49	41.4	3.17	10.1	4.69	3.7	0.62	1.14	2.07	27	0	0.07657	2
98	1	38	0	16	0	1	0.5	102	78	25.3	21.5	13	16.1	5.93	75.5	110.32	288	321.06	44.5	2.1	8.2	10.11	4.04	0.73	1.2	2.57	27	0	0.047191	1
99	2	60	1	9	0	0	13	139	79	25	15.2	17.8	18.1	4.37	51.2	100.23	211.6	293.6	44	3.5	7.6	6	4.51	0.94	1.43	2.47	27	0	0.0795455	2
100	2	60	1	6	0	0	0.008	125	73	25	20.2	18.8	23.3	6.77	48.9	101.76	293.8	229.4	44.9	2.29	7.2	6.59	5.75	1.1	1.52	2.24	27	0	0.0510022	1
101	2	29	0	12	0	0	2	111	78	22.1	11.4	15.5	13.9	5.83	57.5	119.95	267	272.75	40.1	2.66	6.6	5.08	4.14	0.61	1.02	2.85	27	0	0.0663342	2
102	1	35	0	16	1	0	0.5	120	89	31.8	10.5	8.9	28.7	4.99	63	121.37	252.2	294.68	41.1	2.54	12.2	11.32	5.24	1.45	1.21	3.68	27	0	0.0618005	1
103	2	38	0	9	0	0	8	145	89	18.8	20.5	14.5	11.5	3.73	35.2	132.33	269	201.68	43.1	1.76	8.4	8.42	3.85	0.85	1.31	2.22	27	0	0.0408353	1
104	1	43	0	9	0	1	5	151	108	29.9	42.2	31	43	6.26	68.7	110.72	630.7	314.22	41.8	2.54	11	10.53	4.69	3.98	1.04	2.63	27	0	0.0607656	1
105	1	55	0	12	1	1	5	158	99	26.6	26.5	18.3	39.5	6.75	69.6	101.23	314	331.55	42.4	3.26	8.1	7.36	5.7	4.3	0.83	3.75	27	0	0.0768868	2
106	2	58	0	12	0	0	6	138	85	22.5	35.3	22.6	78	6.68	50.1	102.38	281.9	362.1	37.7	2.82	11.4	6.9	5.68	1.89	1.56	3.11	27	0	0.0748011	2
107	1	41	0	12	1	0	0.5	126	93	19.2	15.6	12.9	29.3	7.41	44.8	133.86	226	340.3	41.6	2.35	9.1	9.21	3.55	1.37	0.69	2.34	27	0	0.0564904	1
108	2	24	0	16	0	0	0.003	131	76	24.4	30	18.7	30.5	3.31	52	128.41	328.9	264.24	44.6	3.06	9.2	7.79	5.53	1.81	1.15	4.03	27	0	0.0686099	2
109	2	55	0	12	1	0	3	117	74	24.6	19.5	15.8	30.8	7.43	40.7	111.95	229.1	254.15	39.6	3.17	7	7.09	5.22	3.51	0.97	3.1	28	0	0.0800505	2
110	1	45	0	12	1	1	13	143	89	26.6	15.5	7.5	89.9	5.2	71.4	107.46	292.6	367.71	46	2.98	9.2	10.87	6.65	5.61	1.23	3.72	28	0	0.0647826	1
111	2	57	0	9	0	0	9	127	81	27.7	37.7	33.5	34.3	4.88	48.8	103.99	291.4	280.73	43.7	2.72	6.4	5.74	4.31	1.07	1.15	2.8	28	0	0.0622426	1
112	1	53	0	9	1	0	4	112	85	25.8	21.9	15.5	26.3	4.84	76.2	98.91	320.4	243.48	44.3	2.46	6.6	7.43	4.31	1.33	0.84	3	28	0	0.0555305	1
113	1	47	0	9	1	1	0.027	130	63	30.4	25.4	19	32.2	3.66	59.4	114.29	350.7	275.97	46.7	2.66	9.7	5.61	4.85	1.54	1.17	3.1	28	0	0.0569593	1
114	1	67	1	6	0	0	2	184	86	19	13	9.2	25.3	6.03	67.5	94.22	319.4	293.86	44.6	2.42	5.5	5.27	5.87	1.01	1.72	3.38	28	0	0.0542601	1
115	1	48	0	12	1	1	10	145	89	22.6	31.7	21	12.3	6.67	63.2	110.63	248.5	228.71	38.3	2.71	7	5.87	3.49	0.98	1.05	1.97	28	0	0.0707572	2
116	1	50	0	16	1	1	0.5	195	112	24.1	17.6	13.9	55.7	4.94	61.3	110.46	246.8	303.45	45.6	3.23	10.7	10.33	6.12	6.96	0.96	2.95	28	0	0.0708333	2
117	1	71	1	9	1	0	5	170	78	24.2	15.5	11.1	19.1	6.21	68.9	90.84	227.6	307.04	42.3	2.39	6.9	8.08	5.18	1.77	0.98	3.56	28	0	0.0565012	1
118	2	67	1	6	0	0	16	111	64	28.5	9	19.2	24.6	5.91	46.5	98.46	182.2	234.31	44.2	3.14	7.2	9.49	3.76	1.13	1.67	1.5	28	0	0.0710407	2
119	1	19	0	12	0	0	3	120	86	22	14.1	12.6	23.3	4.17	54.4	144.25	427.1	256.2	38.8	2.19	7.1	7.27	4.54	1.3	1	3.04	28	0	0.0564433	1
120	1	51	0	12	0	1	18	134	71	28.1	48.1	26.5	36.6	4.51	62.5	108.82	407.3	289.52	39.8	2.54	8.9	5.8	3.54	2.83	0.81	1.91	28	0	0.0638191	1
121	2	50	0	9	0	0	21	135	84	22.5	57.5	31.4	17.4	6.45	40.7	115.96	334.9	233.67	40.7	2.16	9.8	7.76	4.73	2.12	1.22	2.9	28	0	0.0530713	1
122	2	58	0	9	0	0	6	127	88	27.1	21.4	17.6	49	4.91	49.9	102.51	362	286.5	37.9	3.1	8.6	6.99	5.88	3.67	0.98	4.03	28	0	0.0817942	2
123	1	62	1	6	1	1	12	142	87	27.1	19.9	18.8	19.1	7.24	74.8	93.56	387.6	230.76	47.2	2.42	10	9.17	4.64	1.85	0.9	2.99	28	0	0.0512712	1
124	1	65	1	6	1	1	8	122	82	24.6	12.3	12.8	20.7	6.28	63.9	97.73	284.3	306.66	40.3	2.79	9.5	9.86	4.84	1.2	3.34	2.81	28	0	0.0692308	2
125	2	60	1	12	1	0	12	144	77	24.1	13.4	18.3	22	5.26	48.7	101.89	210.8	235	40.4	2.62	7.5	7.15	4.8	2.04	1.12	3.25	28	0	0.0648515	1
126	1	57	0	12	1	1	17	126	72	24.8	32.9	19.2	24.3	5.51	51.4	113.06	339.4	206.67	42.9	2.46	8.6	10.33	3.19	1.58	0.74	1.98	28	0	0.0573427	1
127	1	43	0	16	1	0	6	126	73	21.8	17.5	13.2	47.7	7.81	54.6	121.68	317.2	285.47	39.8	2.39	8.1	5.94	4.36	2.3	0.75	2.8	28	0	0.0600503	1
128	2	56	0	12	0	0	8	141	97	25.7	39.4	22.1	27	6.99	49.3	104.38	249.4	328.53	46.9	3.11	7.1	8.15	5.36	2.41	1.41	3.22	28	0	0.0663113	2
129	1	49	0	12	1	1	10	166	93	22.5	31.8	23.4	110.5	4.77	62.5	110.36	474.4	296.65	41.3	2.13	7.6	6.66	4	2.25	1.21	2.27	28	0	0.0515738	1
130	1	57	0	9	0	0	8	71	68	28.3	18.7	16.2	26.8	8.01	65	102.66	453	238.85	40.4	2.95	10.1	10.44	2.24	3.24	0.52	1	28	0	0.0730198	2
131	1	48	0	12	0	0	0.5	122	78	28.4	24.1	17	53	7.58	57.2	115.26	282.6	278.23	42.5	2.22	6.6	5.62	5.17	1.4	1.13	3.49	28	0	0.0522353	1
132	1	56	0	9	1	1	5	164	111	22.6	29.2	17.5	56.7	6.66	65.6	102.99	171.7	274.27	40.7	2.66	9	7.9	4.82	1.18	1.2	2.84	28	0	0.0653563	2
133	1	51	0	9	0	1	14	156	95	26.1	18.7	15.6	25.4	4.83	69	104.48	325.3	261.08	42.3	2.81	7.6	6.49	3.47	0.5	1.03	1.68	28	0	0.0664303	2
134	1	37	0	12	0	0	2	133	86	24.4	22.7	21.7	25.1	5.49	84.1	101.67	381.2	302.04	44.7	1.97	8	6.7	3.54	2.37	0.79	1.84	28	0	0.0440716	1
135	1	47	0	16	1	1	20	135	86	29.4	21.5	11.2	84.1	6.18	75.7	103.45	308.6	231.96	38	2.7	7.5	5.96	5.39	2.11	0.9	4.05	28	0	0.0710526	2
136	1	45	0	16	1	1	10	130	80	25.5	19.5	18.4	23.7	6.59	59.2	116.06	295.6	314.1	46.8	2.46	11.4	13.06	4.68	0.9	1.28	2.93	28	0	0.0525641	1
137	1	40	0	16	0	1	10	103	73	27	21.7	17	24.7	6	61.2	118.58	317.5	305.77	40.8	2.5	6.7	6.1	4.31	1.94	1.04	3	28	0	0.0612745	1
138	2	65	1	9	0	0	13	152	66	27.7	20.1	20	44.6	4.88	52.9	95.74	233.9	328.28	40.7	3.12	10.9	10.77	7.51	10.6	0.98	1.81	28	0	0.0766585	2
139	1	31	0	12	0	0	0.005	158	98	28.5	43.5	18.8	53.2	5.93	75.1	116.13	565.4	299.15	42.4	2.77	11.6	12.27	4.67	1.72	1.17	3	28	0	0.0653302	2
140	1	59	0	12	0	1	7	181	85	24.8	12.4	12.1	16.6	3.29	72.4	96.84	383.6	297.33	40.7	2.14	7.1	8.32	4.84	2.98	1.1	3.16	28	0	0.0525799	1
141	1	48	0	12	0	1	3	132	74	23	12.8	12.7	17.4	8.91	88	89.09	361	279.8	41.2	2.65	7.6	8.83	4.07	0.67	1.07	2.61	28	0	0.0643204	1
142	1	47	0	12	1	1	20	103	74	27.4	16.9	14.8	21.9	7.34	87	90.97	407.8	355.04	42	1.85	6.6	7.43	3.85	5.08	0.68	1.88	28	0	0.0440476	1
143	1	37	0	9	1	1	0.003	108	67	23.7	13.5	10.5	37.7	7.08	56	125.61	262.6	281.57	43.9	2.27	8.7	13.41	3.79	1.08	1.21	2.4	28	0	0.0517084	1
144	2	44	0	12	0	0	2	130	86	24.7	20.1	14.5	29	4.88	52.6	111.16	330.8	222.22	37.8	3.31	7.3	7.59	6.06	4.86	3.84	3.56	28	0	0.0875661	3
145	1	46	0	9	1	1	11	133	83	28.5	112.3	67.4	101	4.88	74.4	104.92	448.3	317.69	48.3	2.25	5.8	5.51	4.88	0.89	1.35	3.65	28	0	0.0465839	1
146	1	50	0	9	1	1	5	120	90	24.3	31.9	18	62.3	6.54	88.8	86.89	437.8	346.15	46	2.62	7.6	9.55	5.39	3.86	0.96	3.46	28	0	0.0569565	1
147	1	47	0	12	1	1	20	116	98	29.1	22.6	18.1	37.5	5.82	77.6	102.4	340.3	335.13	43.3	2.54	10.1	14.06	5.75	2.49	1.37	3.85	28	0	0.0586605	1
148	1	61	1	9	0	1	20	188	76	25.8	31.1	21.6	19.1	6.3	67.1	98.52	381.9	289.9	39.9	2.82	7.4	6.9	3.35	1.34	1.06	1.92	28	0	0.0706767	2
149	2	54	0	12	0	0	1	119	76	22.6	46.7	35.6	29.1	6.62	65.5	91.7	275.4	202.6	38.9	3.31	8.9	18.89	6.05	0.93	2.25	3.22	28	0	0.08509	3
150	1	38	0	16	0	1	3	134	88	25.1	22.1	15.9	17.2	5.4	60.7	120.67	301	244.78	43.9	3.31	12.4	8.26	3.42	0.69	0.95	2.1	29	0	0.0753986	2
151	1	49	0	12	1	1	20	128	93	25.9	22	20.2	38	5.81	94.2	81.48	276.9	373.31	46.6	2.5	6	6.15	4.69	2.19	1.12	3.21	29	0	0.0536481	1
152	2	63	1	9	0	0	7	146	90	25.3	16.6	16.7	39.6	3.62	55.5	95.57	279.9	237.9	43.3	2.88	8.9	13.12	5.87	3.87	1.13	3.84	29	0	0.0665127	2
153	1	60	1	9	1	1	7	128	70	24.8	38	33.4	22.8	4.38	56.9	106.17	336.9	297.39	38.8	2.62	6	6.5	3.59	2.21	0.93	2.14	29	0	0.0675258	2
154	2	31	0	12	0	0	2	140	91	26.8	16.7	12.9	31.7	4.16	39	134.39	303.8	282.89	45.1	3.19	10.6	5.51	3.39	1.18	1.18	1.85	29	0	0.0707317	2
155	2	53	0	12	0	0	6	121	56	18	10.2	15.9	12.5	4.23	44.4	110.33	166	243.74	40.6	2.65	6.4	5.97	5.34	0.85	1.41	3.51	29	0	0.0652709	2
156	1	60	1	12	1	1	20	130	80	25.6	31.2	26.1	18.7	4.34	71.9	96.44	136.6	272.59	39.6	2.26	8	3.41	4.97	1.41	1.34	3.47	29	0	0.0570707	1
157	1	57	0	9	0	1	15	112	72	26.9	12.7	18.6	20.1	4.36	79.8	94.13	499	298.1	41.7	2.37	7	8.89	4.09	2.73	0.85	2.89	29	0	0.0568345	1
158	1	53	0	12	0	1	8	112	86	24.2	55.8	32.4	42.7	6.41	77.5	98.22	468.4	371	50.2	2.82	8	9.1	5.52	2.18	0.97	4.17	29	0	0.0561753	1
159	1	41	0	16	0	0	1	93	62	25	10.9	12.3	13.2	6.45	63.3	116.13	333.9	216.81	43.2	2.7	5.9	5.06	4.03	1.14	1.01	2.71	29	0	0.0625	1
160	1	51	0	12	1	1	2	161	97	24.2	14.8	20.6	48	5.58	59	111.43	330.5	263.3	40	2.88	9.7	8.36	4.43	0.82	1.73	1.42	29	0	0.072	2
161	1	69	1	9	0	1	24	150	90	26.7	55.1	32.5	57.9	8.69	52.7	102.86	281.9	287.2	45.7	2.34	9.5	10.59	6.2	2.72	1.06	4.72	29	0	0.0512035	1
162	2	57	0	9	0	0	20	140	71	22.7	49.4	30.9	30	7.25	51.4	102.23	375.3	203.32	43.2	3.5	6.8	8.35	4.67	0.98	1.59	2.72	24	1	0.0810185	2
163	1	47	0	9	0	0	19	126	70	28.1	17.9	15	23.1	6.36	52.2	120.52	288	330.3	38.6	4.12	7.9	5.5	4.42	2.06	1.09	2.81	24	1	0.106736	4
164	1	65	1	6	0	1	6	144	58	29	17.1	14.5	17.6	7.55	59	100.99	270.7	255.76	39.8	3.08	7.9	6.76	4.14	1.22	0.93	2.72	24	1	0.0773869	2
165	2	50	0	12	0	0	12	150	90	21.5	14.5	14.1	159.4	11.71	57.3	103.61	347.9	280.59	24.2	4.11	10.6	5.7	10.16	3.06	2.36	6.97	24	1	0.169835	4
166	1	53	0	12	0	1	25	127	87	23	11.1	12.6	18.8	7.89	69.6	102.66	338.8	287.73	40.2	4.81	11.4	15.7	7.79	2.12	1.32	5.91	24	1	0.119652	4
167	1	48	0	9	1	1	5	153	98	28.1	17.6	11.3	24.3	4.4	57.7	114.85	415.4	300.88	40.3	5.71	9.3	9.33	3.75	1.78	1.06	1.97	24	1	0.141687	4
168	1	60	1	9	1	0	10	142	67	25.8	16.8	12.2	11.9	6.65	78.6	92.97	272.8	213.05	34.2	3.92	10	8.52	3.52	2.17	0.62	2.49	24	1	0.11462	4
169	1	53	0	9	1	0	9	130	90	23.7	10.8	11.3	18.3	8.14	78.8	97.55	341.6	224.42	39	4.64	10	3.5	5.11	1.32	1.03	3.73	24	1	0.118974	4
170	1	56	0	9	1	1	6	135	93	27.5	20.7	17.2	115.2	6.93	81.5	92.41	343.5	180.22	32.4	4.26	8.2	6.81	4.92	1.25	1	3.46	24	1	0.131481	4
171	2	47	0	12	1	0	16	122	71	22.1	16.2	16.3	66.4	5.64	85.2	70.09	288.3	286.56	24.5	6.58	10.6	3.71	9.33	3.82	1.83	6.34	24	1	0.268571	4
172	1	67	1	6	1	0	19	131	81	18.1	13.1	15.7	33.6	6.54	54.6	102.81	199.1	145.4	43.7	4.57	12.1	13.19	3.86	0.65	1.34	2.67	24	1	0.104577	3
173	1	46	0	12	0	0	13	155	107	25.2	97.3	44.9	73.8	6.75	66.5	109.87	379.9	377.4	45.4	3.88	9	8.28	3.96	2.63	0.95	2.87	24	1	0.0854626	3
174	2	61	1	6	0	0	23	158	71	28.9	29	20.7	14.7	6.24	39.1	136.67	321.5	221.05	36	5.13	11.4	11.91	6.43	2.57	1.19	4.39	24	1	0.1425	4
175	1	48	0	12	1	1	6	214	117	28.9	25.7	29	20.7	7.37	113.2	65.71	409.9	340.5	36.4	5.16	6.5	7.94	7.13	1.52	1.54	5.63	24	1	0.141758	4
176	1	53	0	9	1	1	2	94	76	27	12.1	15	21.8	8.39	64.8	105.72	239	326	38.9	3.64	10	10.92	6.13	1.12	1.44	3.98	24	1	0.0935733	3
177	1	54	0	9	1	1	12	165	88	28.4	35.5	19.6	24.2	4.97	55	112.3	381	259	42.2	3.32	8.7	10.34	4.46	2.08	0.9	2.81	24	1	0.078673	2
178	1	74	1	6	0	0	20	148	83	27.4	11.7	14.7	32.1	7.01	89	73.21	256.7	273.7	42.4	4.08	8.1	14.18	4.89	1.74	1.28	2.94	24	1	0.0962264	3
179	1	58	0	12	1	1	15	164	98	26.1	32.4	23.6	46.4	5.36	49.8	113.74	411.5	216	39.4	3.32	9.5	14.34	5.2	1.27	1.36	3.12	24	1	0.084264	3
180	1	42	0	12	1	1	10	137	96	27.2	38.8	25.9	54.2	8.98	67.3	112.45	495	279	42.5	3.98	9.8	6	4.92	1.19	0.95	3.07	24	1	0.0936471	3
181	2	70	1	6	0	0	10	154	84	25.5	12	14.1	20.7	7.84	42	99.72	325.9	253	41.8	3.54	8.2	6.66	6.1	1.73	1.41	3.88	24	1	0.084689	3
182	1	55	0	9	1	1	4	123	83	26	22.7	19.4	44.4	2.91	59.8	107.74	236	323	44.3	4.51	9.4	10.91	4.45	1.39	1.11	2.98	24	1	0.101806	3
183	1	57	0	9	1	0	19	151	85	30.9	25.8	24.3	26.2	7.4	74.2	97.22	407.9	298.3	45.6	3.61	8.9	9.21	2.61	2.39	0.76	1.04	24	1	0.0791667	2
184	2	57	0	9	0	0	15	146	91	24.5	11.7	17.5	17.3	6.35	44.1	107.52	216.1	226.38	44.6	4.27	10.1	6.98	5.51	0.95	1.28	3.69	24	1	0.0957399	3
185	2	52	0	9	0	0	21	112	59	27.4	27.3	42.6	229.8	6.21	56.8	102.46	333.4	189.51	36.3	5.42	8.4	9.83	3.47	1.28	1.19	1.49	24	1	0.149311	4
186	1	59	0	9	0	1	20	105	71	25.9	22	19.5	9.8	5.99	56.4	41.15	395.8	295.59	46.9	5.2	6.9	5.71	3.95	1.41	0.94	2.37	24	1	0.110874	4
187	1	58	0	6	0	0	15	143	91	22.5	8.8	14.3	12.2	6.57	70.2	98.77	317.1	190.06	46.5	4.1	10.3	7.79	4.51	0.98	1.41	2.66	24	1	0.088172	3
188	1	54	0	12	0	0	2	134	80	24.5	17.8	16.6	23.6	7.72	72.6	100.19	369.8	190.85	40.2	4.46	10	8.53	5.51	2.19	1.08	3.49	24	1	0.110945	4
189	1	50	0	12	1	1	15	142	77	32	20.5	17.2	20.8	6.56	71.1	103.93	379	277.19	41.7	3.03	6.5	6.52	3.53	1.99	0.65	1.88	24	1	0.0726619	2
190	2	56	0	9	0	0	5	135	82	22.9	25.3	26.5	14.6	4.13	49.9	103.96	199.7	137.15	38.4	3.95	10.6	9.95	4.09	0.99	0.99	2.63	24	1	0.102865	3
191	2	63	1	9	0	0	7	145	79	28.5	21.1	18.1	22.4	7.34	58.3	94.03	287	201.82	39.4	4.3	10	6.79	4.79	2	0.92	3.12	24	1	0.109137	4
192	2	62	1	6	0	0	20	133	79	32	15	13.5	28.6	5.03	55.8	96.07	213	276.72	43.4	4.17	9.6	10.72	4.04	4.09	0.68	1.87	24	1	0.0960829	3
193	2	52	0	12	1	1	30	153	86	26.6	15.6	14.5	18.2	3.99	42.8	112.46	272.5	207.81	36.3	3.85	9.9	7.85	4.32	1.01	1.21	2.66	24	1	0.106061	4
194	1	31	0	12	1	1	9	136	98	31.1	34	17.5	104.3	3.91	54.6	132.39	362.6	328.36	43.3	3.5	9.4	11.28	6.64	8.4	0.79	2.42	23	1	0.0808314	2
195	1	56	0	9	0	0	0.5	172	100	27.7	26.5	18.3	14.5	7.98	56.9	109.2	311.2	285.49	43.2	4.19	9.3	9.86	5.51	1.29	0.95	4.17	23	1	0.0969907	3
196	1	66	1	6	1	1	18	186	86	23.7	17.2	15.6	21.9	3.67	55.6	102.76	452.5	224.19	33.7	4.01	11.2	9.82	6.37	3.35	1.01	4.62	23	1	0.118991	4
197	1	52	0	9	1	1	20	155	82	28.4	26.6	15.5	32.6	6.45	76.9	99.23	274.3	308.44	44.4	3.66	10.5	8.88	3.11	1.82	0.98	1.87	23	1	0.0824324	3
198	1	36	0	12	0	0	2	171	107	28.4	16.9	10.1	38.7	4.35	58.1	124.6	370.1	248.81	39.5	3.54	9.4	11.57	4.56	2.85	0.94	3.39	23	1	0.0896203	3
199	1	59	0	9	0	1	7	118	71	23.5	6.1	7.9	11.3	7.1	82.1	89.69	262.4	181.66	31.9	4.25	10.8	7.24	3.78	1.68	0.9	2.49	23	1	0.133229	4
200	1	59	0	6	1	0	20	155	85	23.1	24.1	20.7	22.4	4.21	79	93.43	321.6	208.64	43.9	4.71	7.7	9.74	4.78	0.85	1.55	2.79	23	1	0.107289	4
201	2	43	0	9	0	0	10	142	83	23.8	9.7	10.3	12.4	6.42	37.2	125.46	239.5	244.98	43.2	3.34	11.1	11.78	5.12	1.44	1.29	3.43	23	1	0.0773148	2
202	2	60	1	9	0	0	14	142	74	25.7	14.1	11.2	29.8	5.27	51.2	100.23	286	197.47	39.1	3.7	11.5	5.6	4.76	1.85	1.02	3.39	23	1	0.0946292	3
203	1	52	0	12	1	1	20	129	75	27.2	44.4	18.9	41.5	5.43	54.7	114.14	389.6	277.79	41.8	3.77	9.8	9.15	3.68	3.66	0.78	1.9	23	1	0.0901914	3
204	1	66	1	9	0	0	1	130	67	21.1	39.5	27.1	43.3	7.98	57	101.72	341.2	274.5	39	3.25	10.2	15.22	6.12	2.33	1.32	4.42	23	1	0.0833333	3
205	1	66	1	6	1	0	26	120	77	26	19.2	18.5	20.3	7.28	78.4	89.23	426.9	231.45	35.5	3.44	10.5	5.73	5.09	2.11	1.12	3.35	23	1	0.0969014	3
206	2	70	1	6	0	0	20	149	84	25.9	8.7	12	28.3	11.96	216.7	19.29	392.1	331.61	30.9	5.02	11.3	10.33	9.13	8.13	1.47	5.38	23	1	0.16246	4
207	1	50	0	12	1	1	0.011	117	86	20.2	84.3	61.4	209.4	7.22	54.5	115.93	262.2	232.3	35.1	2.83	6.1	6.88	3.49	1.03	0.81	2.53	23	1	0.0806268	2
208	2	53	0	12	0	0	7	118	72	23.1	42.6	23.6	16.9	4.69	44.6	110.17	213	172	33.1	3.89	13.8	12.31	7.68	1.2	1.51	4.8	23	1	0.117523	4
209	1	73	1	6	0	1	10	118	65	24.8	10	10.8	31.1	11.13	121.9	50.41	457.8	349	36.7	4.45	7.3	4.83	5.06	1.33	1.01	3.31	23	1	0.121253	4
210	1	56	0	9	0	1	19	125	77	24.9	8.2	13.2	37.9	5.63	71.8	99.24	316.3	312	44	3.73	7.8	15.3	5.47	1.49	1.67	3.5	23	1	0.0847727	3
211	1	66	1	9	1	1	20	200	110	27.1	14.2	16.9	51.4	5.5	78.8	89.04	346.2	251	39.3	3.21	8.9	5.58	7.34	6.92	0.8	4.3	23	1	0.0816794	2
212	2	56	0	9	0	0	17	150	90	22.8	19	14.6	15.8	3.67	36	115.75	341.2	194.64	38.4	4	11.1	5.74	5.56	1.61	1.07	3.62	23	1	0.104167	3
213	2	34	0	12	0	0	0.5	132	87	20.9	15.8	17.3	27.4	6.59	48.1	122.81	395.9	353.9	42.5	3.08	6.1	7.28	5.33	1.17	1.17	3.81	23	1	0.0724706	2
214	1	62	1	6	0	1	30	170	80	20.3	15.4	17.6	29.7	7.78	89.8	78.8	378.6	390.5	38	4.77	9.6	9.39	4.64	3.13	1.02	2.96	23	1	0.125526	4
215	1	56	0	9	0	1	6	158	95	23.7	26.7	27.1	78.1	4.59	38.7	127.94	329.8	271.1	33.3	3.86	7.4	13.48	4.02	1.64	1.18	2.29	23	1	0.115916	4
216	1	41	0	12	1	1	8	143	92	29.4	29.2	17.7	71.7	4.21	75.6	107.96	456.9	370.38	40	3.65	7	5.21	4.87	3.39	1	3.22	23	1	0.09125	3
217	2	57	0	9	0	0	2	174	79	25.5	14.8	14.9	19	6.83	63.1	93.93	407.7	237.21	41.4	3.22	9.2	8.51	4.49	1.36	1.35	3.2	23	1	0.0777778	2
218	1	53	0	9	1	1	13	125	80	27	15.2	19.3	17.7	6.89	77.5	98.22	509.3	280.34	36.6	3.54	9.9	14.35	4.36	1.65	1.42	2.66	23	1	0.0967213	3
219	2	55	0	9	0	0	10	138	83	32.1	14	12.6	32.1	6	35.8	116.78	222.8	231.6	37.7	3.95	10.2	4.48	4.62	1.07	1.37	3.12	23	1	0.104775	3
220	1	68	1	9	1	1	10	129	65	21	15.9	14.4	17.7	9.94	76.5	88.87	323.8	226.2	36.3	3.69	5.9	7.17	3.88	0.7	1.08	2.57	23	1	0.101653	3
221	2	22	0	9	0	0	0.014	141	87	26.1	22.5	15.2	21.4	5.15	51	131.06	156.4	311.24	43	4.43	7	8.6	5.03	1.96	1.22	3.49	23	1	0.103023	3
222	1	57	0	9	1	1	23	198	80	26.4	11.4	13.2	20.4	5.42	88.2	83.41	413.8	219.23	40.1	4.56	8.3	7.61	3.11	0.98	0.93	1.73	23	1	0.113716	4
223	1	38	0	12	0	0	11	77	54	31.1	21.2	16.7	28.1	6.89	130	59.63	482.6	268.61	22.5	6.63	11.1	6.45	8.25	10.94	1.01	1.94	23	1	0.294667	4
224	2	60	1	6	0	0	20	122	75	21	17.4	17.3	25.2	4.29	51.3	100.16	283.9	230.39	40.4	4.02	8.2	5.62	4.53	1.97	0.93	3.09	23	1	0.099505	3
225	2	48	0	6	0	0	1	126	73	23.4	13.4	12.6	15.6	8.35	56.5	105.57	272.3	282.24	41.8	4.38	9	17.84	5.69	10.7	0.97	1.62	22	1	0.104785	3
226	1	47	0	12	1	1	18	120	74	30.6	12.6	13.8	54.1	5.87	51.3	121.38	471.1	250.37	35.1	3.82	11.2	12.93	5.94	2.5	1.31	3.81	22	1	0.108832	4
227	1	41	0	9	1	0	8	124	90	36.2	26.9	21.3	92.7	8.35	93.7	86.75	541.4	282.9	45.6	5.05	6	5.65	6.27	3.54	0.95	5.14	22	1	0.110746	4
228	1	60	1	6	1	0	16	158	62	23.4	12.8	10	33.6	5.04	47.1	114.75	255.5	245.53	41	3.43	9.7	12.66	2.82	2.21	0.62	1.56	22	1	0.0836585	3
229	1	56	0	9	1	1	16	165	90	22.7	18.4	20.4	17.6	9.1	75.9	97	389.3	227	41.3	3.26	7.6	7.16	6.8	0.89	1.79	4.36	22	1	0.0789346	2
230	1	63	1	9	0	1	10	136	91	23.1	13	15	14	6.83	62.9	99.76	354.4	222	35	3.32	6	5.75	4.57	1.83	0.82	2.85	22	1	0.0948571	3
231	2	50	0	9	0	1	8	119	67	22.1	17.6	16.2	32.8	4.96	47	110.59	442.7	303	36.2	4.59	9.5	9.63	7.78	5.51	1.19	4.11	22	1	0.126796	4
232	2	54	0	9	0	0	14	189	100	27	15	14.3	24.9	6.61	56.2	101.39	271	246	43.7	4.94	9.2	5.12	6.87	1.49	1.3	4.38	22	1	0.113043	4
233	1	60	1	9	1	0	10	142	67	25.8	16.8	12.2	11.9	6.65	78.6	92.97	272.8	213.05	34.2	3.92	10	8.52	3.52	2.17	0.62	2.49	22	1	0.11462	4
234	1	65	1	9	1	1	10	156	90	25	25.7	26.9	19.5	18.32	275	19.94	298.4	196	23.9	5.6	7.8	7.87	6.69	0.88	1.95	5.27	22	1	0.23431	4
235	1	73	1	6	0	1	20	118	64	32	11.7	19.4	21	13.15	142.3	41.81	419.2	270	31.9	4.85	15.5	7.35	7.06	3.23	1.13	4.26	22	1	0.152038	4
236	1	49	0	12	1	0	21	145	90	30.4	19.8	14.1	25.4	6.33	61.2	111.32	337.4	223.04	40.2	3.49	10.7	13.36	3.81	1.95	0.79	2.37	22	1	0.0868159	3
237	2	58	0	9	0	1	15	138	90	22.3	14.7	13.7	20.1	4.85	37.3	112.81	299.4	250.23	42.7	3.89	10.5	9.57	6.22	1.26	1.5	4.16	22	1	0.0911007	3
238	2	65	1	9	0	0	40	148	76	26	9.4	13.6	37.9	10.09	130.3	36.96	477.1	196.83	45.8	8.84	8.1	4.78	3.78	1.65	0.79	2.24	22	1	0.193013	4
239	1	54	0	9	1	1	12	154	98	24.3	39.8	21.8	37.9	11.41	105.6	68.52	414.3	304.35	39.2	6.73	10	18.98	4.7	2.06	0.96	2.57	22	1	0.171684	4
240	1	52	0	9	0	1	17	167	95	24.8	10.6	13	16.4	8.51	73.2	101.26	299.9	194.47	37.5	4.08	10.4	16.17	3.49	2.17	0.98	1.82	22	1	0.1088	4
241	2	68	1	9	0	0	20	175	99	23.4	13.4	13.8	19.4	6.1	63.3	86.62	269.5	245.46	40.9	3.9	10.5	9.7	5.14	0.85	1.22	3.38	22	1	0.0953545	3
242	1	55	0	6	0	1	13	122	80	26.7	13.1	15	26.5	5.17	65.1	104.05	257	253.47	43.8	4.11	9.2	4.98	4.81	0.61	1.31	3.09	22	1	0.0938356	3
243	2	36	0	12	0	0	2	104	69	22.9	19.3	21.6	146.4	3.92	37.8	131.09	440.7	231.55	41.9	5.08	12.6	14.02	6.86	10.03	0.93	2.08	22	1	0.121241	4
244	1	52	0	9	0	1	0.022	127	76	24.8	11.6	12.4	23.6	8.6	68.9	103.81	239.1	269.82	35	4.2	12.7	4.82	4.32	0.49	1.39	2.52	22	1	0.12	4
245	1	63	1	9	1	1	10	142	101	22.8	22.4	25.8	27.7	8.29	87.7	80.51	638.1	322.41	32.4	5.67	6.5	4.72	6.3	1.19	1.32	4.53	22	1	0.175	4
246	2	56	0	9	0	1	30	152	85	25.7	9.7	11.8	16.3	4.48	36.4	115.33	168.8	219.56	34.8	3.19	11.8	11.48	3.08	0.85	0.91	1.63	22	1	0.0916667	3
247	2	59	0	9	0	0	20	122	77	27.3	15.5	20.8	37.3	7.12	54.4	98.94	281	257.1	41.3	4.35	11	11.32	4.89	2.82	1.3	2.82	22	1	0.105327	4
248	2	51	0	9	0	0	1.5	180	77	35.7	15.8	13.2	22.5	6.4	46.5	110.21	285.6	278.6	40.5	3.93	7.4	6.13	3.18	1.2	1.14	1.48	22	1	0.097037	3
249	1	51	0	6	0	0	11	181	84	27.7	42.8	24.8	25.9	5.62	60	110.66	298	263.44	39.5	3.46	9.6	11.13	2.39	0.68	0.89	1.05	22	1	0.0875949	3
250	2	63	1	6	0	0	20	153	91	21.9	20.4	18.4	28.8	5.81	54.2	96.32	369.9	288.1	44.4	3.25	10.6	10.54	4.62	1.21	1.36	2.65	22	1	0.0731982	2
251	2	68	1	9	0	0	13	114	60	16.4	13.9	16.6	15.1	10.4	39.1	103.54	167.1	271.46	40	3.7	12.3	15.45	6.33	0.94	1.76	4	22	1	0.0925	3
252	2	71	1	6	0	0	33	145	58	24.2	10.9	10.6	13.3	6.13	52.1	92.25	347.4	254.57	40.3	4.54	10.6	6.52	4.73	2.81	1.06	3	22	1	0.112655	4
253	2	56	0	9	0	0	12	154	85	27.9	29	23.4	46.2	7.46	39	112.74	190.7	214.23	39.4	4.25	10.3	9.36	6.82	1.04	1.7	5.06	22	1	0.107868	4
254	1	48	0	12	0	0	22	156	100	30.7	22.5	16.8	31.1	18.61	307	19.67	613.8	327.05	38.7	4.85	7.2	5.82	6.31	2.41	1.03	4.92	22	1	0.125323	4
255	1	56	0	12	1	1	20	110	88	24.7	8.5	11.9	16.6	4.79	105.1	67.95	322.1	159.6	31.3	7.91	10.7	9.82	3.31	1.52	1.16	1.84	22	1	0.252716	4
256	1	41	0	12	1	0	2	111	75	30.1	27.9	19.1	19.2	4.68	71.6	110.4	285.6	183.33	34.3	4.15	8.9	8.2	3.32	1.18	0.71	2.26	22	1	0.120991	4
257	2	31	0	12	1	1	4	108	73	31.2	16	12.9	43.9	3.73	41.8	131.36	371.1	251.6	38.3	5.89	6.5	5.26	4.41	1.39	0.97	3.2	22	1	0.153786	4
258	1	69	1	9	1	1	20	155	90	27	16.4	16.7	46.4	12.93	105.1	62.02	485.7	284.8	40.6	4.15	7.2	8.82	4.71	1.73	1.22	2.97	22	1	0.102217	3
259	2	44	0	9	0	0	2	122	82	20.6	12.9	9.9	24.2	6.06	43	118.78	207.5	269.21	36.6	4.78	12	7.63	3.47	0.95	1.14	2.19	22	1	0.130601	4
260	2	46	0	12	0	0	10	161	81	23.4	9.8	13.3	8.8	3.46	45.4	115.05	207.3	235.7	36.7	3.36	12.9	10.69	5.31	1.18	1.66	2.97	21	1	0.0915531	3
261	1	50	0	12	1	1	7	152	90	24	29.8	19.1	25.9	6.6	68.8	105.35	354.2	304.4	41.9	3.89	8.8	14.5	4.57	1.88	0.97	3.3	21	1	0.0928401	3
262	1	56	0	9	1	1	9	140	80	24.7	14.9	15.7	26.8	7.39	82.8	90.66	341.8	294.6	46.9	3.46	6.6	7.18	5.52	1.11	1.52	3.67	21	1	0.073774	2
263	2	65	1	9	0	0	33	139	70	22.9	22.8	25	27.8	3.74	50.6	97.15	357.9	213	39.2	3.86	9	10.56	3.2	1.57	0.75	1.97	21	1	0.0984694	3
264	2	55	0	9	0	0	12	128	75	28.3	17.4	16	12.2	4.61	34.8	117.87	294.2	177	33.5	3.82	8.7	7.81	4.83	1.43	0.89	3.12	21	1	0.11403	4
265	2	45	0	9	0	0	0.008	135	79	23.4	9.4	11.2	18.3	4.08	35.8	125.28	223.4	229	41.6	3.4	11.6	18.01	5.5	0.67	1.42	4.01	21	1	0.0817308	2
266	1	64	1	9	0	0	10	178	84	24.9	22.9	25.7	18	6.23	70.2	94.69	342	298.3	37.4	4.74	7.7	10.22	5.36	4.51	0.63	3.16	21	1	0.126738	4
267	1	56	0	9	1	1	10	144	74	28.1	15.8	20.2	44	7.6	84.5	88.46	390.6	329.8	39.2	3.95	9.1	9.35	5.71	3.95	0.93	3.33	21	1	0.100765	3
268	1	66	1	6	0	0	8	152	73	24.2	17.9	22.2	32.3	6.91	66.6	95.41	242.2	217.39	33.9	4.2	11.7	5.57	6.78	1.34	1.1	4.46	21	1	0.123894	4
269	1	52	0	9	0	1	9	149	79	25.1	11.3	17.2	20.4	3.26	70.2	103.02	328.8	260	43.4	3.59	6	6.54	5.9	1.32	1.22	3.59	21	1	0.0827189	3
270	1	49	0	9	0	1	10	175	110	30.9	28.9	18.8	68.5	6.41	92.7	83.08	106.2	317	42	4.41	9.9	20.06	6.03	3.38	1.18	3.96	21	1	0.105	3
271	1	47	0	9	0	0	18	139	86	22.2	20.4	19.3	24.6	3.54	62.1	112.22	228.6	312.7	44.6	3.58	9	10.24	5.02	1.18	1.67	3	21	1	0.0802691	2
272	1	48	0	9	1	1	10	141	92	23.8	44.4	18.8	46.3	5.22	49.6	122.22	311.4	277.53	39.5	4.71	7.7	8.66	3.9	1.34	0.88	2.44	21	1	0.119241	4
273	1	58	0	12	0	0	10	116	74	27.7	23.5	22.4	66.4	5.93	89.1	81.81	290.2	302	44.8	4.64	11.3	17.06	3.12	1.13	1.1	2.09	21	1	0.103571	3
274	1	59	0	6	0	0	20	162	94	30.1	21.5	36.4	40.1	3.92	77.4	94.22	398.8	273	38.9	3.95	8.9	10.84	3.37	1.35	1.29	2.21	21	1	0.101542	3
275	2	62	1	6	0	0	20	127	69	23.4	11.7	18.1	27.1	6.19	47.3	101.44	307.5	224	34.7	3.54	7.3	6.64	4.54	2.93	0.98	2.92	21	1	0.102017	3
276	2	63	1	6	0	0	25	165	81	19.4	17.9	23.9	9.5	7.02	63.4	89.54	255.7	156	39.2	4.23	7	7.13	5.99	0.6	2.67	3.51	21	1	0.107908	4
277	2	70	1	6	0	0	31	187	81	22.1	11.7	13.3	41.6	12.07	127.9	36.49	463.9	225	35.9	4.7	7.9	9.21	6.8	5.87	1.1	3.77	21	1	0.130919	4
278	2	49	0	9	0	0	20	129	76	22.6	20.6	25.4	13.8	6.47	89.4	65.21	260.6	180	43.8	3.15	7.3	5.95	4.95	1.08	1.86	2.99	21	1	0.0719178	2
279	2	73	1	6	0	0	20	144	81	22.9	9.4	12.6	24.3	4.73	42.7	97.11	312.9	185	34	4.49	14.2	12.01	4.83	1.54	1	3.48	21	1	0.132059	4
280	2	59	0	9	0	0	20	130	68	21.5	13.4	15.4	12.1	6.51	49.1	102.34	238.2	146	40.9	3.51	10.2	5.56	4.58	2.55	0.96	3.16	21	1	0.0858191	3
281	1	60	1	9	0	0	27	136	73	23.5	15.6	19.8	27.2	10.04	81.3	90.12	635.5	208	43.1	4.58	9.4	12.18	5.28	3.06	1.1	3.55	21	1	0.106265	4
282	2	66	1	6	0	0	20	149	67	21.4	17.6	24.7	70.8	5.66	48.4	97.89	289.1	203	44.6	3.94	12.7	18.76	5.86	1.05	1.26	3.93	21	1	0.0883408	3
283	2	45	0	12	0	0	8	147	73	23.6	17.2	22.9	22.5	4.09	44.3	116.8	193	214	39.8	4.38	5.9	5.67	5.27	2.3	1.07	3.42	21	1	0.11005	4
284	1	55	0	9	1	1	1	98	63	20.1	9.3	15.8	32.3	9.7	118.8	59.01	551.1	266	29.8	4.53	14.7	3.89	6.33	2.14	0.98	4.29	21	1	0.152013	4
285	2	76	1	6	0	0	14	188	97	24.4	17.9	21.6	45.2	8.87	56	86.97	384.5	301	42.8	5.21	10.7	10.75	4.85	2.19	1.12	3.3	21	1	0.121729	4
286	1	52	0	9	0	1	10	144	100	27.2	107.8	71	244.7	8.72	68.3	104.19	371.1	238	42.7	3.11	9.1	9.35	4.47	1.65	1.05	2.94	21	1	0.0728337	2
287	1	58	0	9	0	1	16	149	92	34.6	25.6	18.9	225.1	5.37	52.3	111.47	355.2	248	40	4.15	9.1	11.4	5.24	6.72	0.87	2.83	21	1	0.10375	3
288	2	58	0	9	0	0	20	160	80	26.3	19.4	22.2	36.3	10.32	178.9	26.46	353.5	269	35.2	5.12	8.9	5.7	5.02	2.09	1.39	3.08	21	1	0.145455	4
289	2	63	1	9	0	0	25	124	88	25.4	11.7	12.1	28.6	7.27	46.1	101.59	251.8	211	36.6	3.68	10.8	9.73	5.4	1.64	1	3.7	21	1	0.100546	3
290	1	32	0	12	1	1	3	140	90	25.2	24.6	33.4	29.7	8.29	140.4	56.67	438.7	344	39.4	5.03	8.1	7.45	7.33	3.72	1.02	5.08	21	1	0.127665	4
291	1	58	0	9	1	1	12	154	85	24.4	9.4	11.1	15.1	7.8	63.5	102.93	308.4	301.06	45.4	4.89	6.5	6.18	3.86	1.71	0.79	2.41	21	1	0.107709	4
292	1	55	0	9	0	1	17	142	79	22.6	18	16	62.5	5.77	71.3	100.23	550.1	353	41	3.4	10.3	16.99	5.51	4.74	1.33	3.77	21	1	0.0829268	3
293	1	57	0	9	1	0	24	129	67	25.3	19.2	19.6	45.3	6.79	78.4	95.05	328.9	275	42.6	3.97	10.1	15.23	2.64	1.66	1.11	1.38	20	1	0.0931925	3
294	1	40	0	12	0	0	0.016	142	84	27.8	16.2	16.5	26	5.77	185.4	38.28	300.3	208	40.2	4.34	7.1	5.03	5.45	3.34	0.93	3.12	20	1	0.10796	4
295	1	48	0	8	0	0	10	160	91	24.2	17.2	17.8	19.6	4.56	62	111.51	291.4	241	40	4.21	6.5	6.02	4.53	1.31	1.26	2.79	20	1	0.10525	4
296	2	61	1	8	0	0	25	142	75	22.7	20.5	18.6	33.4	5.93	44.7	104.07	163.5	141	33.3	4.49	8.7	11.35	5.6	1.53	1.36	3.38	20	1	0.134835	4
297	1	70	1	6	0	1	20	180	89	29.4	25.9	27.5	15.7	6.52	71	90.36	248	224	39.4	3.22	8.8	11.13	4.83	2.79	1.11	2.9	20	1	0.0817259	2
298	1	61	1	6	0	0	16	173	85	23.5	16.3	14.4	25.2	8.72	85.9	83.73	407	331.4	38.6	3.7	6.9	6.99	4.08	0.78	1.12	2.47	20	1	0.0958549	3
299	2	34	0	12	0	0	14	141	101	24.2	9.4	11.6	22.9	7.14	87.4	74.46	429.9	262.18	30.5	4.93	12.5	5.72	4.22	2.43	0.88	2.39	20	1	0.161639	4
300	2	57	0	9	0	0	14	137	69	28.3	20.4	15.8	13.1	8.98	38.3	112.62	219.3	194.62	41.9	4.79	6.8	5.51	4.62	1.13	1.14	2.87	20	1	0.11432	4
301	2	49	0	12	0	0	12	134	68	25.8	13.1	13.6	12.6	3.93	39.3	118.13	266	215.38	38.1	4.48	6.9	5.14	3.59	0.8	1.14	2.13	20	1	0.117585	4
302	1	46	0	12	1	1	12	130	79	29.4	14	16.6	29.4	4.78	58.6	115.73	441.4	327.65	35.2	4.34	10.7	7.81	6.62	4.44	1.29	3.75	20	1	0.123295	4
303	1	58	0	9	1	0	12	154	85	24.4	9.4	11.1	15.1	7.8	63.5	102.93	308.4	301.06	45.4	4.22	6.5	6.18	3.86	1.71	0.79	2.41	20	1	0.0929515	3
304	1	37	0	9	1	1	20	138	82	23.9	154.7	112.7	158.5	8.83	99.8	82.67	400	120	33.9	3.59	7.8	6.95	4.13	1.61	1.26	2.47	20	1	0.1059	4
305	2	50	0	9	0	0	6	131	81	27.5	24.6	18.1	31.6	6.52	48.4	109.53	351	332.5	44.8	3.95	9.6	13.88	5.2	3.16	1.03	3.98	20	1	0.0881696	3
306	1	54	0	9	1	1	24	125	77	26.2	18.5	14.9	18.8	5.36	46	120.86	427.7	232	43.1	3.99	6.4	5.34	4.48	0.94	1.21	2.81	20	1	0.0925754	3
307	2	58	0	9	0	0	19	150	70	24.2	10.5	13.3	16.6	4.83	46.6	104.84	353.2	202	38.4	4.17	8.4	8.1	6.69	1.26	1.31	3.9	20	1	0.108594	4
308	2	58	0	6	1	0	32	118	60	24.9	11.4	17.1	11.5	10.44	74.1	76.81	353.5	214	41.3	3.8	7.6	21.18	3.51	1.14	1.3	2.44	20	1	0.0920097	3
309	1	55	0	6	1	0	9	142	79	28.4	3.5	13.1	14.3	6.91	62.8	105.6	272.9	215	40.2	4.49	6.7	5.98	6.71	1.42	1.66	4.22	20	1	0.111692	4
310	1	56	0	6	1	1	14	131	69	26	36.9	29.9	36.1	9.9	58.8	107.73	386.5	260	38.7	3.61	7.7	6.09	4.55	1.44	0.97	2.97	20	1	0.0932817	3
311	1	54	0	6	1	1	23	127	83	23.4	13.1	17.5	16.8	5.47	67.2	103.42	363.3	214	38.8	4.46	12.4	5.45	3.81	1.85	1.31	2.4	20	1	0.114948	4
312	1	48	0	9	0	1	15	134	86	29.6	28.9	28	74.2	5.44	67.6	107.61	291.6	240	38.8	3.44	9.8	10.03	5.16	1.58	1.19	3.84	20	1	0.0886598	3
313	1	50	0	9	1	1	20	156	86	24	19.5	20.2	40.7	5.51	83.6	93.47	241.7	220	43.1	2.84	8.6	12.99	5.29	3.94	1.03	3.3	20	1	0.0658933	2
314	2	60	1	6	0	1	20	167	82	26.7	11.4	15.5	20.7	5.95	50.5	100.68	249.1	178	34.3	3.11	8.9	15.3	4.83	2.85	1.15	3.08	20	1	0.0906706	3
315	2	63	1	6	0	0	0.003	183	85	27.5	10	13.3	32.3	7.59	75.8	72.15	456.8	202	28.8	4.59	11	10.31	6.29	1.97	1.13	4.4	20	1	0.159375	4
316	2	60	1	9	0	0	20	142	72	23.4	8	10	26.5	5.51	62.5	93.04	348.5	207	34.8	5.32	9.3	8.96	5.32	2.13	1.08	3.52	20	1	0.152874	4
317	1	49	0	9	0	1	10	160	104	24.2	26.8	22.1	36.1	7.16	76.3	101.67	497.2	375	42.7	3.58	9	11.55	5.91	3.89	1.12	3.64	20	1	0.0838407	3
318	2	57	0	9	1	0	16	136	69	25.8	14.4	9.8	38.6	5.14	47.6	104.85	331.4	195	40.1	3.61	9	4.72	5.62	1.36	1.11	3.8	20	1	0.0900249	3
319	1	62	1	9	1	0	16	142	99	25.3	14.3	19.8	23	6.08	89.8	78.8	335.5	153	30.3	4.61	9.5	5.42	5.48	1.18	1.07	4.14	20	1	0.152145	4
320	1	64	1	9	0	0	10	129	75	24.4	12.6	12.8	16.6	5.39	58.7	101.92	245.1	192	38.2	4.32	8.8	6.59	4.14	1.2	1.06	2.74	20	1	0.113089	4
321	2	55	0	12	0	0	10	161	93	26.5	30.8	17	38.9	4.48	49.3	105.11	284.8	226	35.1	3.55	12	13.2	6.82	5.47	1.08	4.23	20	1	0.10114	3
322	1	52	0	12	0	1	5	120	83	25	30.6	21.7	23	4.38	54.7	114.14	316.5	286	40.5	3.66	8.7	11.14	6.12	3.16	1.15	3.84	20	1	0.0903704	3
323	1	63	1	6	1	1	24	140	73	28.7	28.4	24.5	24.8	6.1	78.9	90.89	375.4	257	40.8	3.29	7.8	5.87	5.57	1.41	1.32	3.29	20	1	0.0806373	2
324	1	69	1	6	0	1	25	207	102	25.7	16.3	14	34	8.39	76.6	88.2	426.8	263	39.6	3.26	8.2	8.59	4.71	1.72	1.47	3.45	20	1	0.0823232	3
325	1	39	0	12	0	0	7	168	116	23.6	23.2	16.6	20.3	7.38	89.3	93.24	493.7	207	40.3	3.47	9.2	8.18	4.66	1.36	0.98	2.9	20	1	0.0861042	3
326	2	58	0	9	0	0	15	121	79	20	8.8	14.6	25.3	4.22	38	112.12	261.9	212	37.2	3.3	12.9	6.86	6.01	3.48	1.32	3.36	20	1	0.0887097	3
327	1	58	0	9	1	0	12	154	85	24.4	9.4	11.1	15.1	7.8	63.5	102.93	308.4	301.06	46.4	5.12	6.5	6.18	3.86	1.71	0.79	2.41	20	1	0.110345	4
328	1	51	0	9	1	1	2	159	100	25.2	17.1	17	19.8	6.64	119.8	60.08	434.5	213.06	29.7	5.44	7.7	8	4.3	1.38	0.9	2.71	20	1	0.183165	4
